# Supplementary material
Source: publisher site journal article supplement (https://www.dovepress.com/article/538924)
Supplement: Supplementary file 1 [file Appendix%201_1_1.docx]

**Appendix 1** Simplified Family Mindfulness Meditation Training Program (for 6-9-year-old Children with ADHD)

| Items | Specific Contents |
| --- | --- |
| Training Objectives | Through short-duration and high-frequency mindfulness exercises, improve children's attention stability, emotional regulation ability and quality of family interaction, and assist in alleviating the core symptoms of ADHD. |
| Core Exercise Contents | 1. Breath Observation Training  Frequency and Duration: Twice a day, 5 minutes each time  Operation Steps: Play soothing natural music (such as the sound of streams, birds chirping), guide children to close their eyes or half-close their eyes, and focus their attention on the breath flow at the nostrils (the abdomen bulges when inhaling, and contracts when exhaling)  Distraction Handling: Parents guide with gentle words (such as "Our little nose is inhaling again, let's count along with it"), and avoid criticism  2. Simplified Body Scan  Frequency and Duration: Three times a week, 3 minutes each time  Operation Steps: Parents gently touch the child's body parts (such as forehead, shoulders, palms), and guide them to say "Now I feel the sensation in ______ (part)", so as to cultivate body awareness |
| Family Implementation Process | 1. Preparation Stage: Choose a quiet and undisturbed space (such as the child's bedroom), and place a cartoon breathing guidance chart (the flower opens when inhaling, and closes when exhaling)  2. Practice Time: It is recommended to fix it 30 minutes after getting up in the morning or 1 hour before going to bed, and adjust according to the child's schedule (avoid fatigue or excitement)  3. Recording and Feedback: Use the "Mindfulness Passport" to record the daily completion (stick star stickers as rewards), and review the experience of "the quietest breath" with the child every week |
| Key Points for Parents' Guidance | 1. Avoid excessive demands of "must concentrate", and accept that distraction is a normal phenomenon (such as saying "It's okay, our attention has flown away like a little butterfly, just gently find it back")  2. Parents need to participate in the practice simultaneously and set an example (such as "Mom is also counting along with the breath now")  3. If the child shows resistance, it can be combined with a game-like way (such as "Let's play the 'wooden man breathing' game to see who can be the wooden man the longest") |
